# Supplementary material
Source: PubMed Central journal article supplement (PMC6355070)
Supplement: fj.201800499R.sd1.pdf [file fj.201800499R.sd1.pdf]

## Supplemental Figure 1

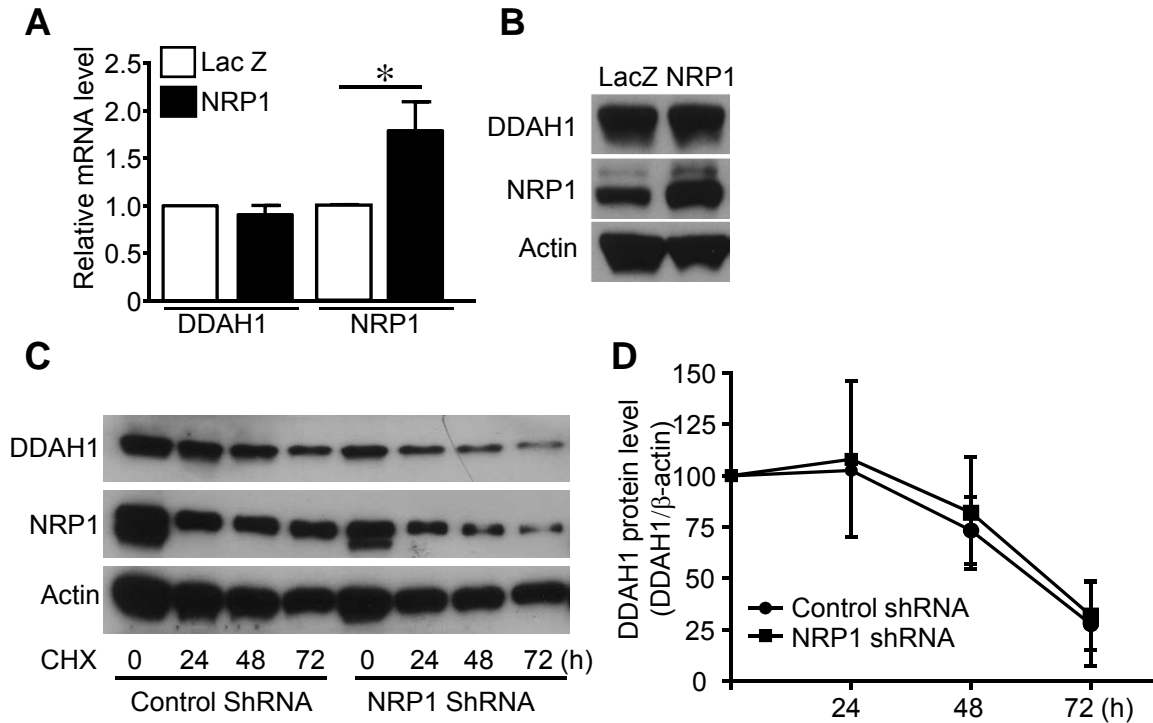

**Supplemental Fig. 1. Effect of NRP1 on protein stability of DDAH1 in vascular endothelial cells.** A-B. HUVECs were infected with lentivirus expressing LacZ or NRP1. Expression of DDAH1 and NRP1 were examined with qPCR (A) and western blotting (B). C-D. HUVECs were infected with lentivirus expressing control shRNA or NRP1 shRNA and then administrated with cycloheximide (CHX, 20  $\mu$ g/mL). Protein lysates collected at 24h, 48h and 72 h were subjected to Western blotting with the indicated antibodies (C). The blots were scanned and quantified with the control group which was normalized to 1 (D). For A and C, n=3 for each group; for B and C, Images are representative of three independent experiments. \*,  $p < 0.05$ .

## Supplemental Table 1. Primers for qPCR

|                         |                                                                       |
|-------------------------|-----------------------------------------------------------------------|
| human<br>NRP1           | Forward: gactggggctcagaatg<br>Reverse: ctatgaccgtgggctttct            |
| human<br>DDAH1          | Forward: gcaactttagatggcggaga<br>Reverse: ctttggaaggcccaaa            |
| human<br>DDAH2          | Forward: ggactcccttccaccaa<br>Reverse: ttctgttctcacctgtctcc           |
| human<br>$\beta$ -actin | Forward: ccaaccgagagaagatga<br>Reverse: ccagaggcgtacagggatag          |
| Mouse NRP1              | Forward: tctgggaaactggtatatctatga<br>Reverse: cattccagagcaaggataatctg |
| Mouse<br>DDAH1          | Forward: agtaccagaaagcgcaaag<br>Reverse: aagccgtccacctttcc            |
| Mouse 18S               | Forward: tgtggtgtgaggaaagcag<br>Reverse: tccatccttcacatccttc          |
